# Supplementary material for: Maltose and Maltodextrin Utilization by Listeria monocytogenes Depend on an Inducible ABC Transporter which Is Repressed by Glucose
Source: PubMed Central journal article supplement (PMC2860498; doi:10.1371/journal.pone.0010349), 2010-04-27
Supplement: pone.0010349.s001.pdf [file pone.0010349.s001.pdf]

**Table S1.** Growth of wild type and revertants in TSB supplemented with maltose or maltodextrin, respectively. Indicated is the optical density at 600 nm after 24 hrs. at 37 °C, means from three independent experiments.

| <b>Strain</b>     | <b>TSB+25 mM maltose</b> | <b>TSB+ 1% maltodextrin</b> |
|-------------------|--------------------------|-----------------------------|
| Wild type         | 0.85 ± 0.08              | 1.10 ± 0.10                 |
| Revertant Ins2123 | 0.84 ± 0.05              | 1.05 ± 0.11                 |
| Revertant Ins2126 | 0.85 ± 0.06              | 1.05 ± 0.09                 |
| Revertant Ins2128 | 0.86 ± 0.05              | 1.07 ± 0.10                 |
| Revertant Ins0278 | 0.86 ± 0.08              | 1.08 ± 0.11                 |
