# Supplementary material for: Maltose and Maltodextrin Utilization by Listeria monocytogenes Depend on an Inducible ABC Transporter which Is Repressed by Glucose
Source: PubMed Central journal article supplement (PMC2860498; doi:10.1371/journal.pone.0010349), 2010-04-27
Supplement: pone.0010349.s002.pdf [file pone.0010349.s002.pdf]

**Table S2.** Oligonucleotide primers used in the study.

| Oligoname (target gene)    | Sequence                                |
|----------------------------|-----------------------------------------|
| <b>Mutant construction</b> | Introduced restriction sites underlined |
| 2123 upx (Xbal)            | 5'-TCCTT <u>CTAGAC</u> AAAAGTAGC-3'     |
| 2123deE1 (EcoRI)           | 5'-CCCAG <u>AATTC</u> TTAACGATTGC-3'    |
| 2123dwxo (XhoI)            | 5'-CAATG <u>CTCGAG</u> AAACTGCTC-3'     |
| 2123 Up                    | 5'-CGATTAATTCACAAGTTATCC-3'             |
| 2123upE (EcoRI)            | 5'-CTGATCTTTCAT <u>GAATTC</u> -3'       |
| Amy B2-2126(BamHI)         | 5'-AAAGCAG <u>GGATCC</u> ACCATCAA-3'    |
| Amy x3-2126 (XhoI)         | 5'-GAATA <u>CTCGAG</u> TCTGTTGTAT -3'   |
| Amy up (2126)              | 5'-AAGCTTGCCAGAATTTCCAG-3'              |
| 2128UP                     | 5'-TCGGACTTTTAGAGAGAATGC-3'             |
| 2128XA (Xbal)              | 5'-GGCGAC <u>CTAGA</u> AAGATGTTG-3'     |
| 2128XO (XhoI)              | 5'-TTGTG <u>CTCGAG</u> TTGCAAAG-3'      |
| 0278-I (up)                | 5'-ATAGAAAGAGGGCGAAGAAAG-3'             |
| 0278-EcoRI                 | 5'-TGACAAAG <u>AATTC</u> ATCGTTTTTG-3'  |
| 0278-BamHI                 | 5'-TTTAAG <u>GATCC</u> AGTTAAGCC-3'     |
| <b>pG+host4</b>            | Flanking multiple cloning site          |
| Blue R                     | 5'-GGAAACAGCTATGACCATC-3'               |
| M13                        | 5'-GTAAAACGCGGCCAGT-3'                  |
| <b>Primers for qRT-PCR</b> |                                         |
| 2121R                      | 5'-GATTTCTGCGCGTTAATTTTC-3'             |
| 2121FI                     | 5'-ATTGGCCCTAAAGGATTACTG-3'             |
| 2122R                      | 5'-TCATCCAAATGAAAAGTGTCGT-3'            |
| 2122FI                     | 5'-CTACCTAAGCGAAATAACGTC-3'             |
| 2123R                      | 5'-AAGTCCTACCGCAATCGTTAAG-3'            |
| 2123FI                     | 5'-ACTTGATGGCGCAGGACATTTC-3'            |
| 2124R                      | 5'-TCCAAAAGACGTTCCCTTA-3'               |

|           |                               |
|-----------|-------------------------------|
| 2124FI    | 5'-TGGGTTGGGTTTAAGAACTTC-3'   |
| 2125R     | 5'-ACATTAAGTTTTCGGCACCTGT-3'  |
| 2125FI    | 5'-ACAAATGAAGTACCGGCTAAC-3'   |
| 2126R     | 5'-CCGTCAATATCAAACCTCACGAA-3' |
| 2126FI    | 5'-GTTTCCCAGTTCGTCAAATG-3'    |
| 2128FI    | 5'-ATTGCGAAATAGTTCCAGTATC-3'  |
| 2128R     | 5'-TTTTGGCGATGAAATCCTATCT-3'  |
| 0278R     | 5'-GCCAAGGATATTTGCTGCAT-3'    |
| 0278F     | 5'-CTTTGCGTATGATTGCTGGA-3'    |
| plcAR     | 5'-CCGCGGACATCTTTAATGT-3'     |
| plcAFI    | 5'-CGAGCAAAACAGCAACGATA-3'    |
| actAR     | 5'-AAGCATCCGCAACTGACTCT-3'    |
| actAFI    | 5'-ATAGCGCAGCGGAAATAAA-3'     |
| rpoBqRT-F | 5'-CACCCCTGAAGCTCCATTGT-3'    |
| rpoBqRT-R | 5'-ACACGACGAACCCAGATTTC-3'    |
